# Supplementary material for: Comparison of Heat and Drought Stress Responses among Twelve Tartary Buckwheat (Fagopyrum tataricum) Varieties
Source: MDPI journal article supplement (doi:10.3390/plants11111517), 2022-06-06
Supplement: s1 [file s1]

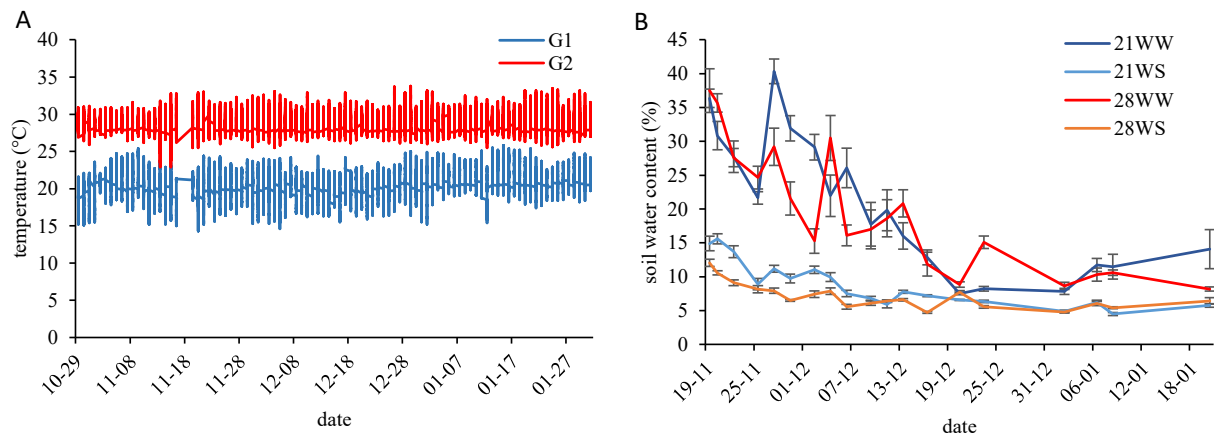

**Figure S1.** Environmental conditions during the experiment. (A) Temperature in the greenhouse. G1: greenhouse at 21°C, G2: greenhouse at 28°C. (B) Soil water content in pots before watering. Plants were grown at 21 °C or 28 °C under well-watered (WW) or water stress (WS) conditions. Watering was performed Monday, Wednesday, and Friday for WW plants and Monday and Friday for WS plants.

**Table S1.** Name and origin of the *F. tataricum* varieties used in this study.

| Variety  | Country of Origin | Accession Number in Genebank |
|----------|-------------------|------------------------------|
| Islek    | LUX               | /                            |
| Zlata    | SLO               | /                            |
| PI481644 | BTN               | 01Z5100001                   |
| PI481656 | BTN               | 01Z5100005                   |
| PI427239 | NPL               | 01Z5100030                   |
| PI476852 | USA               | 01Z5100014                   |
| PI481670 | BTN               | 01Z5100008                   |
| Lifago   | DEU               | 01Z5100010                   |
| PI481646 | BTN               | 01Z5100003                   |
| PI481652 | BTN               | 01Z5100004                   |
| PI481671 | BTN               | 01Z5100009                   |
| PI481659 | BTN               | 01Z5100007                   |

**Table S2.** Statistical results (ANOVA2) of the measured parameters of *F. tataricum* varieties subjected to two temperatures (21°C vs. 28 °C) and water supply conditions (well-watered (WW) vs. water-stressed (WS)).

| Parameter*       | Islek                          | Zlata                          | Lifago                         | PI481659                      | PI481656                       | PI481671                       | PI481652                       | PI427239                       | PI476852                       | PI481644                       | PI481646                       | PI481670                       |
|------------------|--------------------------------|--------------------------------|--------------------------------|-------------------------------|--------------------------------|--------------------------------|--------------------------------|--------------------------------|--------------------------------|--------------------------------|--------------------------------|--------------------------------|
| Leaves           | T: NS<br>W: NS<br>T × W: NS    | T: ***<br>W: ***<br>T × W: *** | T: ***<br>W: ***<br>T × W: *** | T: NS<br>W: ***<br>T × W: **  | T: NS<br>W: ***<br>T × W: ***  | T: ***<br>W: ***<br>T × W: *** | T: ***<br>W: ***<br>T × W: *** | T: ***<br>W: ***<br>T × W: *** | T: ***<br>W: ***<br>T × W: *** | T: *<br>W: ***<br>T × W: ***   | T: ***<br>W: ***<br>T × W: *** | T: ***<br>W: ***<br>T × W: *** |
| Height           | T: ***<br>W: **<br>T × W: NS   | T: ***<br>W: ***<br>T × W: NST | T: ***<br>W: ***<br>T × W: NS  | T: ***<br>W: ***<br>T × W: ** | T: ***<br>W: ***<br>T × W: *** | T: ***<br>W: ***<br>T × W: NS  | T: ***<br>W: ***<br>T × W: NS  | T: ***<br>W: ***<br>T × W: *   | T: **<br>W: ***<br>T × W: NS   | T: ***<br>W: ***<br>T × W: NS  | T: ***<br>W: ***<br>T × W: NS  | T: *<br>W: ***<br>T × W: *     |
| Leaf area        | T: ***<br>W: ***<br>T × W: NS  | T: ***<br>W: ***<br>T × W: NST | T: ***<br>W: ***<br>T × W: NS  | T: ***<br>W: ***<br>T × W: NS | T: ***<br>W: ***<br>T × W: NS  | T: ***<br>W: ***<br>T × W: NS  | T: ***<br>W: ***<br>T × W: NS  | T: ***<br>W: ***<br>T × W: **  | T: ***<br>W: ***<br>T × W: NS  |
| Ramification     | T: NS<br>W: ***<br>T × W: *    | T: NS<br>W: ***<br>T × W: ***  | T: NS<br>W: NS<br>T × W: ***   | T: NS<br>W: NS<br>T × W: NS   | T: *<br>W: ***<br>T × W: ***   | T: NS<br>W: NS<br>T × W: *     | T: NS<br>W: NS<br>T × W: ***   | T: *<br>W: *<br>T × W: NS      | T: NS<br>W: NS<br>T × W: *     | T: ***<br>W: NS<br>T × W: **   | T: NS<br>W: NS<br>T × W: **    | T: NS<br>W: NS<br>T × W: **    |
| Tolerance index  | T: ***<br>W: *<br>T × W: ***   | T: *<br>W: ***<br>T × W: NST   | T: ***<br>W: ***<br>T × W: NS  | T: ***<br>W: ***<br>T × W: NS | T: ***<br>W: ***<br>T × W: **  | T: ***<br>W: ***<br>T × W: NS  | T: ***<br>W: ***<br>T × W: NS  | T: ***<br>W: ***<br>T × W: NS  | T: **<br>W: ***<br>T × W: *    | T: ***<br>W: ***<br>T × W: NS  | T: *<br>W: ***<br>T × W: ***   | T: **<br>W: ***<br>T × W: NS   |
| Leaf DW          | T: NS<br>W: **<br>T × W: *     | T: NS<br>W: **<br>T × W: *     | T: NS<br>W: NS<br>T × W: **    | T: NS<br>W: *<br>T × W: ***   | T: NS<br>W: NS<br>T × W: *     | T: *<br>W: **<br>T × W: NS     | T: NS<br>W: **<br>T × W: ***   | T: NS<br>W: *<br>T × W: NS     | T: *<br>W: *<br>T × W: ***     | T: NS<br>W: ***<br>T × W: **   | T: NS<br>W: NS<br>T × W: **    | T: NS<br>W: *<br>T × W: *      |
| Stem DW          | T: ***<br>W: **<br>T × W: NS   | T: NS<br>W: ***<br>T × W: NST  | T: *<br>W: ***<br>T × W: NS    | T: **<br>W: ***<br>T × W: NS  | T: NS<br>W: ***<br>T × W: NS   | T: NS<br>W: ***<br>T × W: *    | T: NS<br>W: ***<br>T × W: **   | T: NS<br>W: ***<br>T × W: **   | T: ***<br>W: ***<br>T × W: NS  | T: **<br>W: ***<br>T × W: ***  | T: **<br>W: ***<br>T × W: ***  | T: NS<br>W: ***<br>T × W: NS   |
| Inflorescences   | T: NS<br>W: *<br>T × W: ***    | T: NS<br>W: ***<br>T × W: **   | T: ***<br>W: ***<br>T × W: *** | T: NS<br>W: ***<br>T × W: **  | T: ***<br>W: ***<br>T × W: *** | T: NS<br>W: ***<br>T × W: ***  | T: ***<br>W: ***<br>T × W: *** | T: ***<br>W: ***<br>T × W: *** |
| Node first inflo | T: **<br>W: NS<br>T × W: **    | T: NS<br>W: NS<br>T × W: NST   | T: NS<br>W: **<br>T × W: NS    | T: NS<br>W: NS<br>T × W: *    | T: NS<br>W: NS<br>T × W: NS    |
| Days to inflo    | T: NS<br>W: NS<br>T × W: NS    | T: **<br>W: NS<br>T × W: NST   | T: *<br>W: NS<br>T × W: NS     | T: NS<br>W: NS<br>T × W: *    | T: *<br>W: **<br>T × W: *      | T: NS<br>W: NS<br>T × W: NS    | T: **<br>W: NS<br>T × W: NS    | T: ***<br>W: NS<br>T × W: NS   | T: **<br>W: NS<br>T × W: NS    | T: **<br>W: ***<br>T × W: *    | T: NS<br>W: NS<br>T × W: NS    | T: **<br>W: NS<br>T × W: NS    |
| Flowers/inflo    | T: ***<br>W: **<br>T × W: NS   | T: ***<br>W: NS<br>T × W: NST  | T: ***<br>W: NS<br>T × W: NS   | T: NS<br>W: NS<br>T × W: NS   | T: *<br>W: NS<br>T × W: NS     | T: *<br>W: NS<br>T × W: NS     | T: ***<br>W: *<br>T × W: *     | T: ***<br>W: NS<br>T × W: NS   | T: ***<br>W: NS<br>T × W: NS   | T: **<br>W: NS<br>T × W: NS    | T: ***<br>W: *<br>T × W: NS    | T: ***<br>W: NS<br>T × W: NS   |
| Days to seeds    | T: ***<br>W: NS<br>T × W: NS   | T: ***<br>W: NS<br>T × W: NST  | T: ***<br>W: NS<br>T × W: NS   | T: ***<br>W: NS<br>T × W: NS  | T: ***<br>W: *<br>T × W: NS    | T: ***<br>W: NS<br>T × W: NS   | T: ***<br>W: NS<br>T × W: NS   | T: ***<br>W: **<br>T × W: NS   | T: ***<br>W: NS<br>T × W: NS   | T: ***<br>W: NS<br>T × W: NS   | T: ***<br>W: ***<br>T × W: NS  | T: ***<br>W: NS<br>T × W: NS   |
| Seed set         | T: ***<br>W: NS<br>T × W: NS   | T: ***<br>W: NS<br>T × W: NST  | T: ***<br>W: NS<br>T × W: NS   | T: ***<br>W: NS<br>T × W: NS  | T: ***<br>W: NS<br>T × W: NS   | T: ***<br>W: NS<br>T × W: NS   | T: ***<br>W: *<br>T × W: *     | T: ***<br>W: NS<br>T × W: NS   | T: ***<br>W: ***<br>T × W: *** | T: ***<br>W: NS<br>T × W: NS   | T: ***<br>W: NS<br>T × W: NS   | T: ***<br>W: NS<br>T × W: NS   |
| Seeds/plant      | T: ***<br>W: **<br>T × W: ***  | T: ***<br>W: ***<br>T × W: NST | T: ***<br>W: ***<br>T × W: NS  | T: ***<br>W: ***<br>T × W: NS | T: ***<br>W: ***<br>T × W: NS  | T: ***<br>W: ***<br>T × W: **  | T: ***<br>W: ***<br>T × W: *** | T: ***<br>W: ***<br>T × W: *** | T: ***<br>W: ***<br>T × W: *** | T: ***<br>W: ***<br>T × W: NS  | T: ***<br>W: ***<br>T × W: **  | T: ***<br>W: ***<br>T × W: **  |
| 1000-seed weight | W: ***                         | W: NS                          | W: ***                         | W: NS                         | W: *                           | W: **                          | W: **                          | W: ***                         | W: **                          | W: *                           | W: ***                         | W: NS                          |
| CCI              | W: ***<br>T: ***<br>T × W: *** | W: ***<br>T: NS<br>T × W: *    | W: ***<br>T: NS<br>T × W: **   | W: ***<br>T: NS<br>T × W: *** | W: ***<br>T: ***<br>T × W: NS  | W: ***<br>T: **<br>T × W: ***  | W: ***<br>T: **<br>T × W: **   | W: ***<br>T: **<br>T × W: NS   | W: ***<br>T: NS<br>T × W: **   | W: ***<br>T: ***<br>T × W: *** | W: ***<br>T: ***<br>T × W: NS  | W: ***<br>T: *<br>T × W: NS    |
| φPSII            | W: NS<br>T: NS<br>T × W: NS    | W: NS<br>T: NS<br>T × W: NST   | W: NS<br>T: NS<br>T × W: NS    | W: NS<br>T: NS<br>T × W: NS   | W: NS<br>T: NS<br>T × W: *     | W: NS<br>T: NS<br>T × W: NS    | W: **<br>T: *<br>T × W: NS     | W: NS<br>T: NS<br>T × W: *     | W: NS<br>T: NS<br>T × W: NS    |
| NPQ              | W: NS<br>T: NS<br>T × W: NS    | W: *<br>T: **<br>T × W: **     | W: NS<br>T: NS<br>T × W: NS    | W: NS<br>T: NS<br>T × W: NS   | W: NS<br>T: NS<br>T × W: NS    | W: NS<br>T: NS<br>T × W: NS    | W: NS<br>T: *<br>T × W: NS     | W: NS<br>T: NS<br>T × W: NS    | W: NS<br>T: NS<br>T × W: NS    | W: NS<br>T: NS<br>T × W: NS    | W: NS<br>T: NS<br>T × W: NS    | W: NS<br>T: ***<br>T × W: NS   |

|                        |                                |                                     |                                |                                |                               |                              |                                |                              |                              |                              |                              |                               |
|------------------------|--------------------------------|-------------------------------------|--------------------------------|--------------------------------|-------------------------------|------------------------------|--------------------------------|------------------------------|------------------------------|------------------------------|------------------------------|-------------------------------|
| Ai                     | T: NS<br>W: NS<br>T × W: NS    | T: NS<br>W: *<br>T × W: NST × W: NS | T: NS<br>W: NS                 | T: NS<br>W: NS                 | T: **<br>W: NS                | T: NS<br>W: NS               | T: *<br>W: NS                  | T: **<br>W: NS               | T: NS<br>W: NS               | T: **<br>W: NS               | T: NS<br>W: NS               | T: NS<br>W: NS                |
| Ei                     | T: NS<br>W: ***<br>T × W: NS   | T: NS<br>W: NS<br>T × W: **         | T: ***<br>W: ***<br>T × W: *** | T: ***<br>W: ***<br>T × W: *** | T: ***<br>W: ***<br>T × W: ** | T: ***<br>W: **<br>T × W: *  | T: ***<br>W: ***<br>T × W: *** | T: **<br>W: **<br>T × W: *   | T: **<br>W: NS<br>T × W: NS  | T: ***<br>W: *<br>T × W: **  | T: NS<br>W: **<br>T × W: NS  | T: ***<br>W: ***<br>T × W: ** |
| gs                     | T: **<br>W: ***<br>T × W: NS   | T: ***<br>W: ***<br>T × W: ***      | T: ***<br>W: **<br>T × W: ***  | T: **<br>W: **<br>T × W: ***   | T: ***<br>W: NS<br>T × W: *** | T: *<br>W: *<br>T × W: NS    | T: NS<br>W: *<br>T × W: **     | T: *<br>W: *<br>T × W: *     | T: NS<br>W: NS<br>T × W: *   | T: *<br>W: NS<br>T × W: *    | T: NS<br>W: **<br>T × W: NS  | T: **<br>W: *<br>T × W: **    |
| Polyphenols<br>(leaf)  | T: **<br>W: *<br>T × W: NS     | T: NS<br>W: NS<br>T × W: NST × W: * | T: ***<br>W: *<br>T × W: NS    | T: NS<br>W: NS<br>T × W: NS    | T: NS<br>W: NS<br>T × W: NS   | T: NS<br>W: NS<br>T × W: NS  | T: NS<br>W: NS<br>T × W: NS    | T: NS<br>W: ***<br>T × W: NS | T: NS<br>W: *<br>T × W: NS   | T: *<br>W: ***<br>T × W: NS  | T: NS<br>W: **<br>T × W: NS  | T: NS<br>W: NS<br>T × W: *    |
| Polyphenols<br>(inflo) | T: ***<br>W: ***<br>T × W: *** | T: ***<br>W: NS<br>T × W: *         | T: ***<br>W: NS<br>T × W: NS   | T: ***<br>W: *<br>T × W: ***   | T: **<br>W: NS<br>T × W: NS   | T: ***<br>W: NS<br>T × W: ** | T: ***<br>W: NS<br>T × W: *    | T: **<br>W: NS<br>T × W: *   | T: ***<br>W: NS<br>T × W: NS  |
| Flavonoids<br>(leaf)   | T: NS<br>W: **<br>T × W: NS    | T: NS<br>W: NS<br>T × W: NS         | T: **<br>W: NS<br>T × W: NS    | T: NS<br>W: NS<br>T × W: NS    | T: NS<br>W: NS<br>T × W: NS   | T: NS<br>W: NS<br>T × W: NS  | T: NS<br>W: NS<br>T × W: NS    | T: NS<br>W: *<br>T × W: NS   | T: NS<br>W: NS<br>T × W: NS  | T: NS<br>W: ***<br>T × W: NS | T: NS<br>W: **<br>T × W: NS  | T: NS<br>W: NS<br>T × W: *    |
| Flavonoids<br>(inflo)  | T: ***<br>W: NS<br>T × W: NS   | T: **<br>W: NS<br>T × W: NS         | T: ***<br>W: NS<br>T × W: *    | T: **<br>W: **<br>T × W: ***   | T: NS<br>W: NS<br>T × W: *    | T: **<br>W: NS<br>T × W: *   | T: ***<br>W: **<br>T × W: *    | T: ***<br>W: NS<br>T × W: NS | T: **<br>W: NS<br>T × W: NS  | T: ***<br>W: *<br>T × W: NS  | T: ***<br>W: *<br>T × W: NS  | T: ***<br>W: NS<br>T × W: NS  |

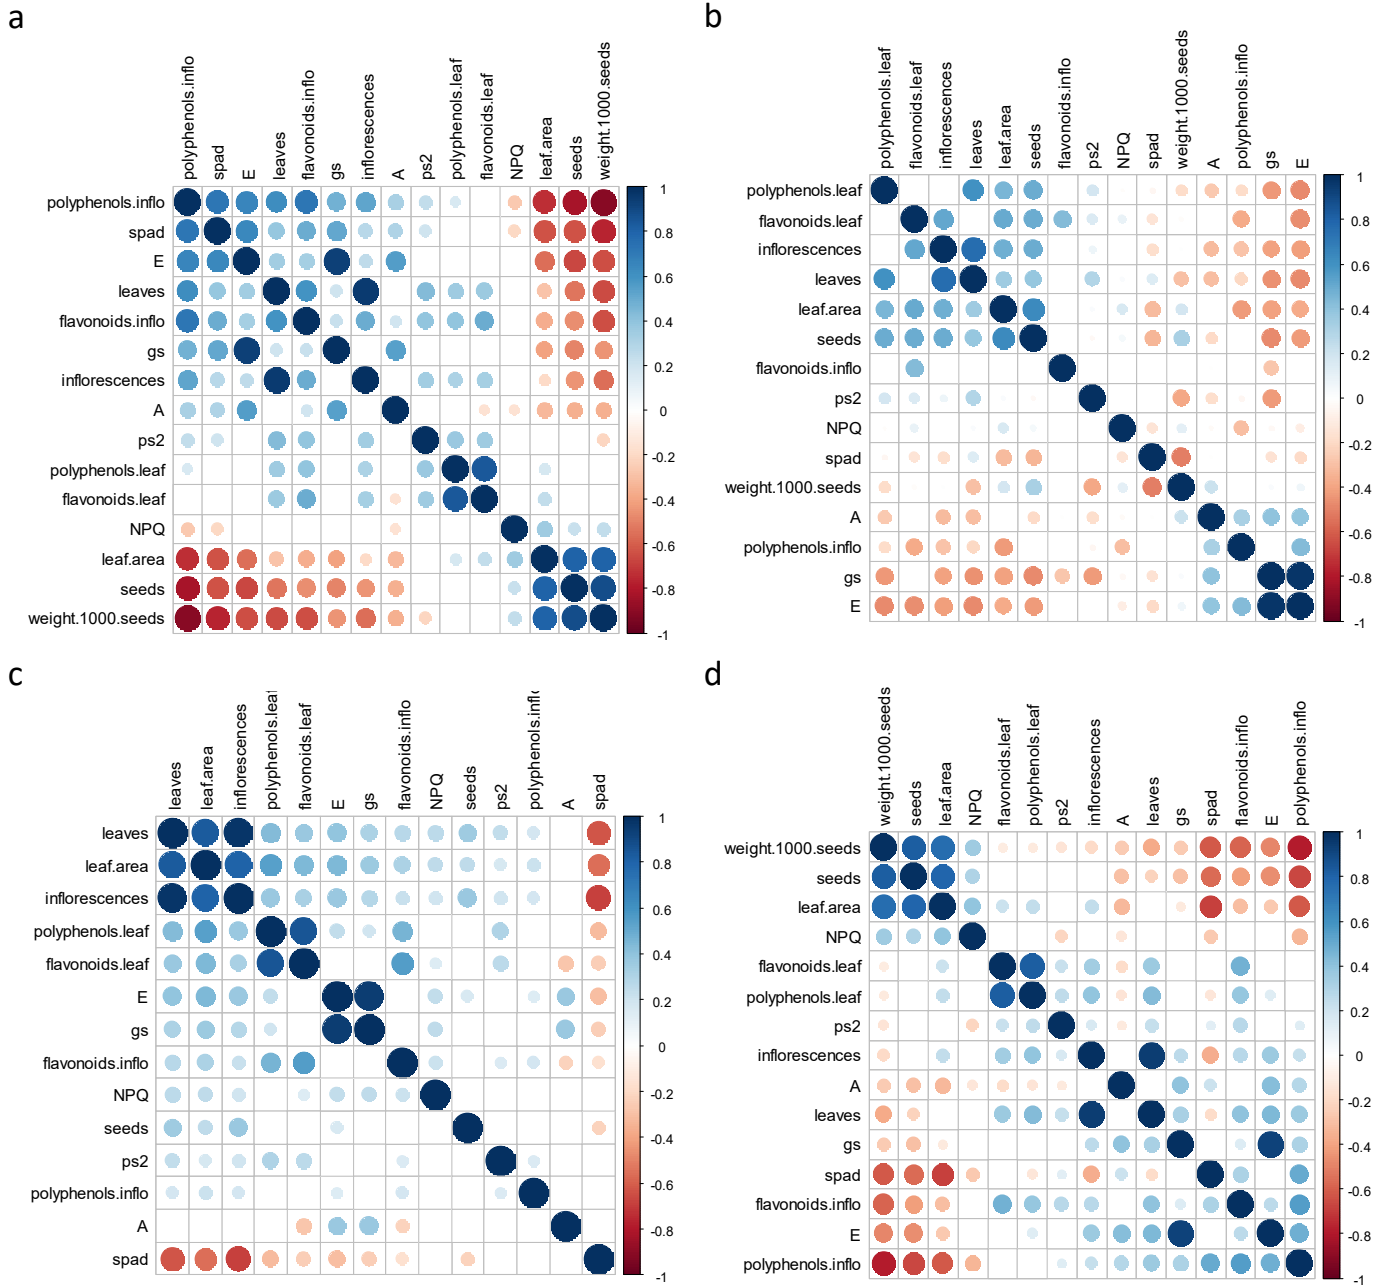

**Figure S2.** Correlations among physiological, plant growth, and yield parameters in *F. tataricum* varieties subjected to two temperatures (21 °C vs. 28 °C) and water supply conditions (well-watered vs. water-stressed). (a) Impact of temperature (21WW and 28WW), (b) impact of water stress at 21 °C (21WW and 21WS), (c) impact of water stress at 28 °C (28WW and 28WS), and (d) impact of temperature and water stress (all conditions).
